# Supplementary material for: Copper Redox Cycling Inhibits Aβ Fibre Formation and Promotes Fibre Fragmentation, while Generating a Dityrosine Aβ Dimer
Source: PubMed Central journal article supplement (PMC6212427; doi:10.1038/s41598-018-33935-5), 2018-11-01
Supplement: 41598_2018_33935_MOESM1_ESM.pdf [file 41598_2018_33935_MOESM1_ESM.pdf]

**Copper Redox Cycling Inhibits A $\beta$  Fibre Formation  
and Promotes Fibre Fragmentation,  
while Generating a Dityrosine A $\beta$  Dimer**

Miao Gu, David C. Bode and John H. Viles

Supplemental Information

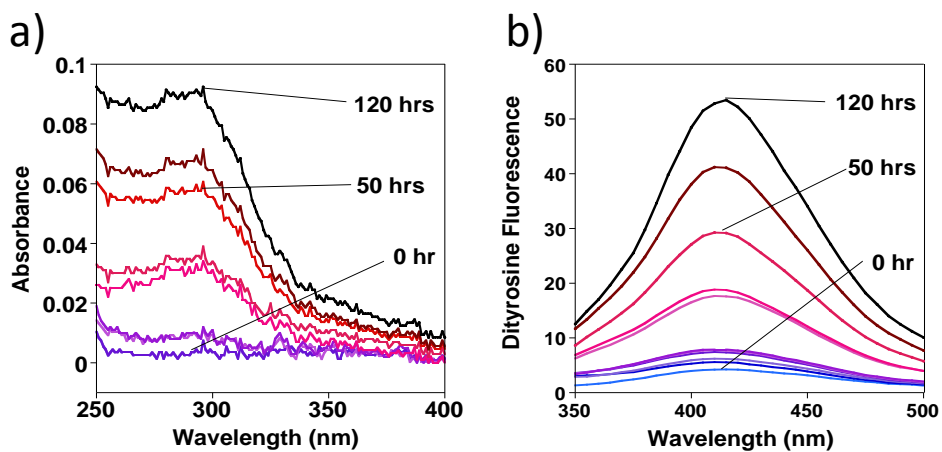

**Supplemental Figure S1: Monitoring Dityrosine formation.** Comparison of UV absorption and fluorescence spectra of Aβ(1-16) in a Cu+H<sub>2</sub>O<sub>2</sub> redox system. Difference UV absorption spectra (a), and fluorescence spectrum excitation at 310 nm (b). 50 μM Aβ(1-16) was incubated with 10 μM Cu<sup>2+</sup> and 1000 μM H<sub>2</sub>O<sub>2</sub>, with 100 mM HEPES buffer pH 7.4 over 120 hours.

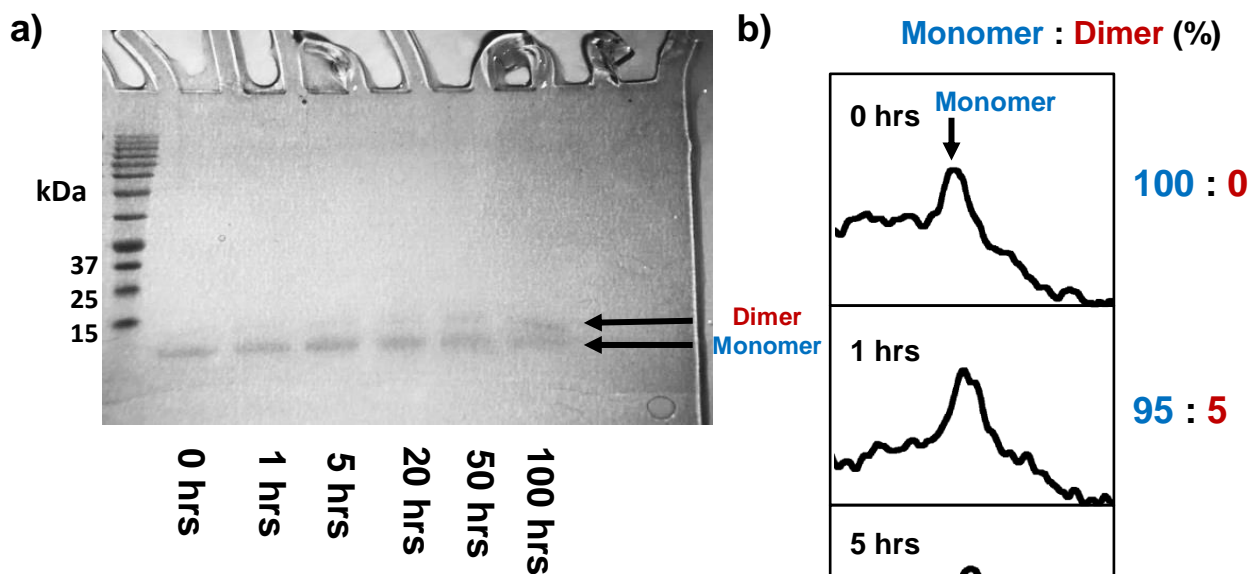

**Supplemental Figure S2: SDS-PAGE of A $\beta$  dimer formation in the presence of Cu(II)+H<sub>2</sub>O<sub>2</sub>**

a) SDS-PAGE for A $\beta$ (1-40) monomer (50  $\mu$ M) incubated with Cu(II) (25  $\mu$ M) and H<sub>2</sub>O<sub>2</sub> (2000  $\mu$ M) over 100 hours.

b) Gel-band intensities measured at each time point reveals that half of the A $\beta$  monomer is converted to a dimer within 100 hours incubation.

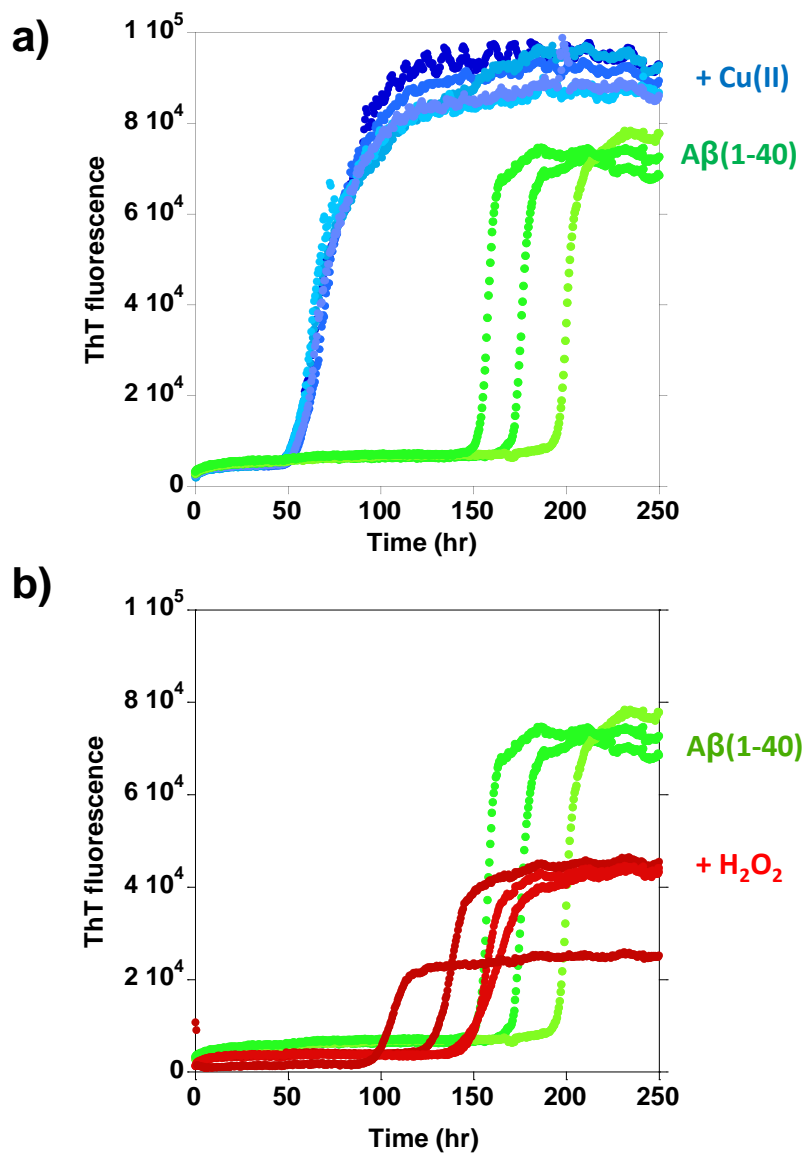

**Supplemental Figure S3. The effect of Cu(II) and H<sub>2</sub>O<sub>2</sub> on A $\beta$ (1-40) in the absence of radical production and dityrosine formation.**

ThT fluorescence was used to monitor A $\beta$  fibre formation. **a)** 10  $\mu$ M A $\beta$ (1-40) (green) + 5  $\mu$ M Cu<sup>2+</sup> (blue). The presence of sub-stoichiometric Cu(II) alone accelerates A $\beta$ (1-40) fibre formation, typically halving the lag-times.

**b)** H<sub>2</sub>O<sub>2</sub> also accelerates fibre formation a little, and reduces the total amount of fibre formed. 10  $\mu$ M A $\beta$ (1-40) (green) + 300  $\mu$ M H<sub>2</sub>O<sub>2</sub> (red).

A $\beta$ (1-40), 10  $\mu$ M, was incubated with 100 mM HEPES pH 7.4, 20  $\mu$ M ThT and 160 mM NaCl at 30°C with intermittent agitation.

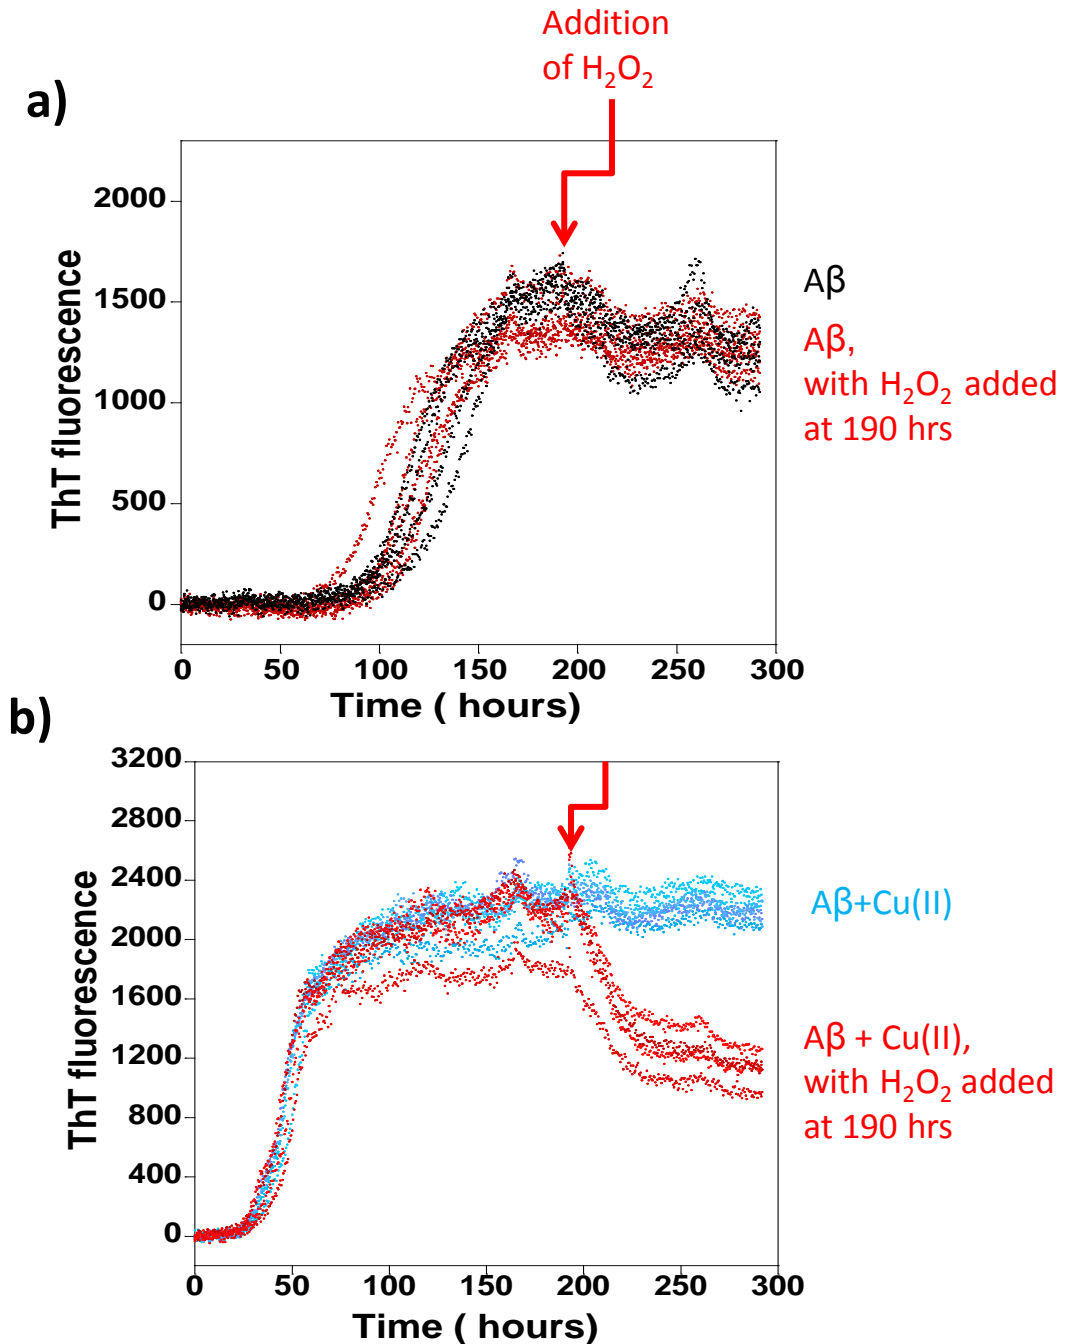

**Supplemental Figure S4: Addition of  $H_2O_2$  to preformed  $A\beta$  fibres or  $A\beta+Cu$  fibres**

a) Addition of  $H_2O_2$  to  $A\beta$  after 190 hrs has no impact on ThT fluorescence intensity.

b) Addition of  $H_2O_2$  to  $A\beta$  with  $Cu(II)$  after 190 hrs halves the ThT fluorescence intensity within 20 hours.  $A\beta(1-40)$ , 10  $\mu M$ , was incubated with 100 mM HEPES pH 7.4, 20  $\mu M$  ThT and 160 mM NaCl at 30°C with intermittent agitation.
